# Supplementary material for: Nickel-catalyzed selective C1–C8 bond cleavage of benzocyclobutenones: theoretical insights into mechanism, substituent effects on regioselectivity, ligand effects on reactivity, and chemoselectivity
Source: Royal Society of Chemistry journal article supplement (doi:10.1039/d3qo01015e), 2023-01-01
Supplement: d3qo01015e2.pdf [file d3qo01015e2.pdf]

## *Supporting Information*

**Nickel-Catalyzed Selective C1–C8 Bond Cleavage of Benzocyclobutenones:  
Theoretical Insights into Mechanism, Substituent Effects on Regioselectivity,  
Ligand Effects on Reactivity, and Chemoselectivity**

Mumin Zhang, Jiangping Yang, Wei Rong and Juan Li\*

College of Chemistry and Materials Science, Guangdong Provincial Key Laboratory of  
Functional Supramolecular Coordination Materials and Applications, Jinan University,  
Guangzhou, Guangdong 510632, P. R. China

\*Corresponding author. Email: tchjli@jnu.edu.cn

---

### **Table of Contents**

---

|                  |                                                                                                            |     |
|------------------|------------------------------------------------------------------------------------------------------------|-----|
| <b>Section 1</b> | Optimization with M06 and PBE0 methods. (Table S1)                                                         | S2  |
| <b>Section 2</b> | Other possible isomers and conformers. (Figs. S1-S2)                                                       | S3  |
| <b>Section 3</b> | The whole free-energy profiles for the formation of byproduct <b>4a</b> . (Fig. S3)                        | S4  |
| <b>Section 4</b> | Comparison among five substrates and four ligands. (Figs. S4-S9)                                           | S5  |
| <b>Section 5</b> | Other possible pathways for the Ni-catalyzed coupling of benzocyclobutenones with indoles. (Figs. S10-S12) | S9  |
| <b>Section 6</b> | Energies (in hartree) of All TSs and Intermediates                                                         | S10 |
| <b>Section 7</b> | Calculated imaginary frequencies of all transition states species                                          | S15 |

---

## Section 1. Optimization with M06 and PBE0 methods

**Table S1.** Relative Gibbs energies (in kcal/mol) for the key transition states with M06 and PBE0 methods.

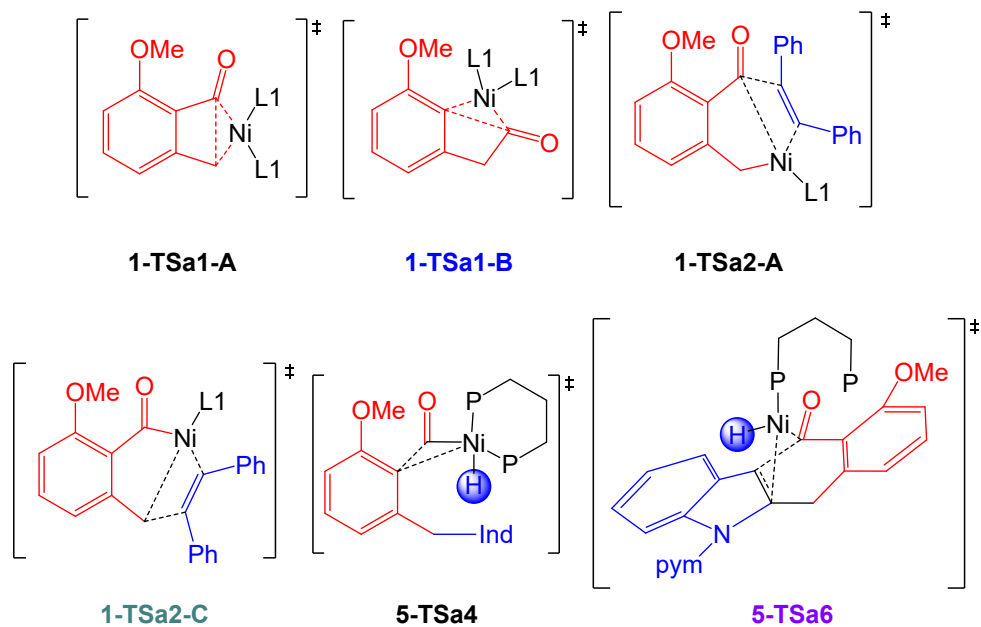

| Species                  | $\Delta\Delta G$ | Species              | $\Delta\Delta G$ | Species             | $\Delta\Delta G$ |
|--------------------------|------------------|----------------------|------------------|---------------------|------------------|
| <b>1-TSa1-A-B3LYP-D3</b> | 0.0              | <b>1-TSa1-A-PBE0</b> | 0.0              | <b>1-TSa1-A-M06</b> | 0.0              |
| <b>1-TSa1-B-B3LYP-D3</b> | 2.4              | <b>1-TSa1-B-PBE0</b> | 1.8              | <b>1-TSa1-B-M06</b> | 1.9              |
| <hr/>                    |                  |                      |                  |                     |                  |
| <b>1-TSa2-A-B3LYP-D3</b> | 0.0              | <b>1-TSa2-A-PBE0</b> | 0.0              | <b>1-TSa2-A-M06</b> | 0.0              |
| <b>1-TSa2-C-B3LYP-D3</b> | 5.8              | <b>1-TSa2-C-PBE0</b> | 7.4              | <b>1-TSa2-C-M06</b> | 8.9              |
| <hr/>                    |                  |                      |                  |                     |                  |
| <b>5-TSa4-B3LYP-D3</b>   | 0.0              | <b>5-TSa4-PBE0</b>   | 0.0              | <b>5-TSa4-M06</b>   | 0.0              |
| <b>5-TSa6-B3LYP-D3</b>   | 21.6             | <b>5-TSa6-PBE0</b>   | 19.0             | <b>5-TSa6-M06</b>   | 21.6             |

## Section 2. Other possible isomers and conformers

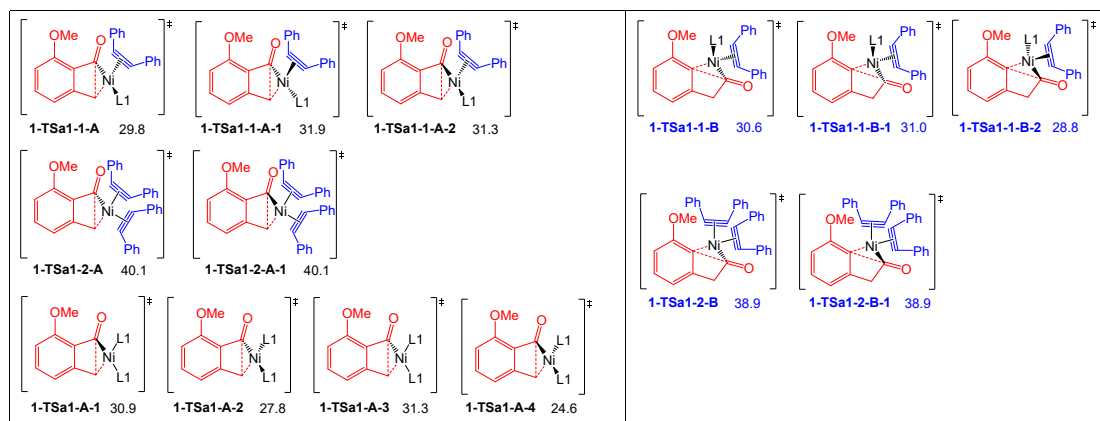

**Fig. S1** Other possible isomers and conformers of oxidative addition transition states.

Values shown are relative free energies in kcal/mol.

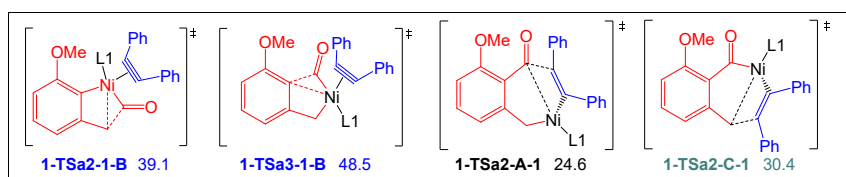

**Fig. S2** Other possible coordination environment of nickel for key transition states.

Values shown are relative free energies in kcal/mol.

### Section 3. The whole free-energy profiles for the formation of byproduct 4a

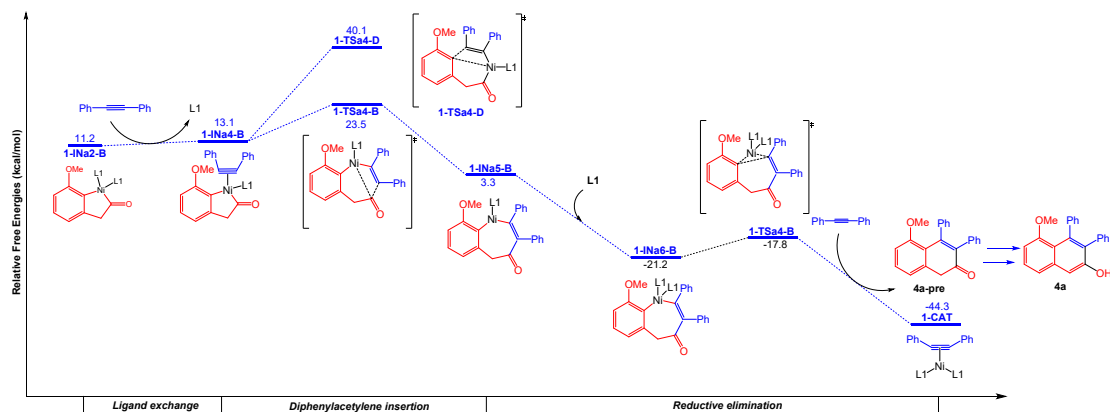

**Fig. S3** Calculated free-energy profiles for the process from 1-IN2a-B to 4a-pre.

Values shown are relative free energies in kcal/mol.

## Section 4. Comparison among five substrates and four ligands

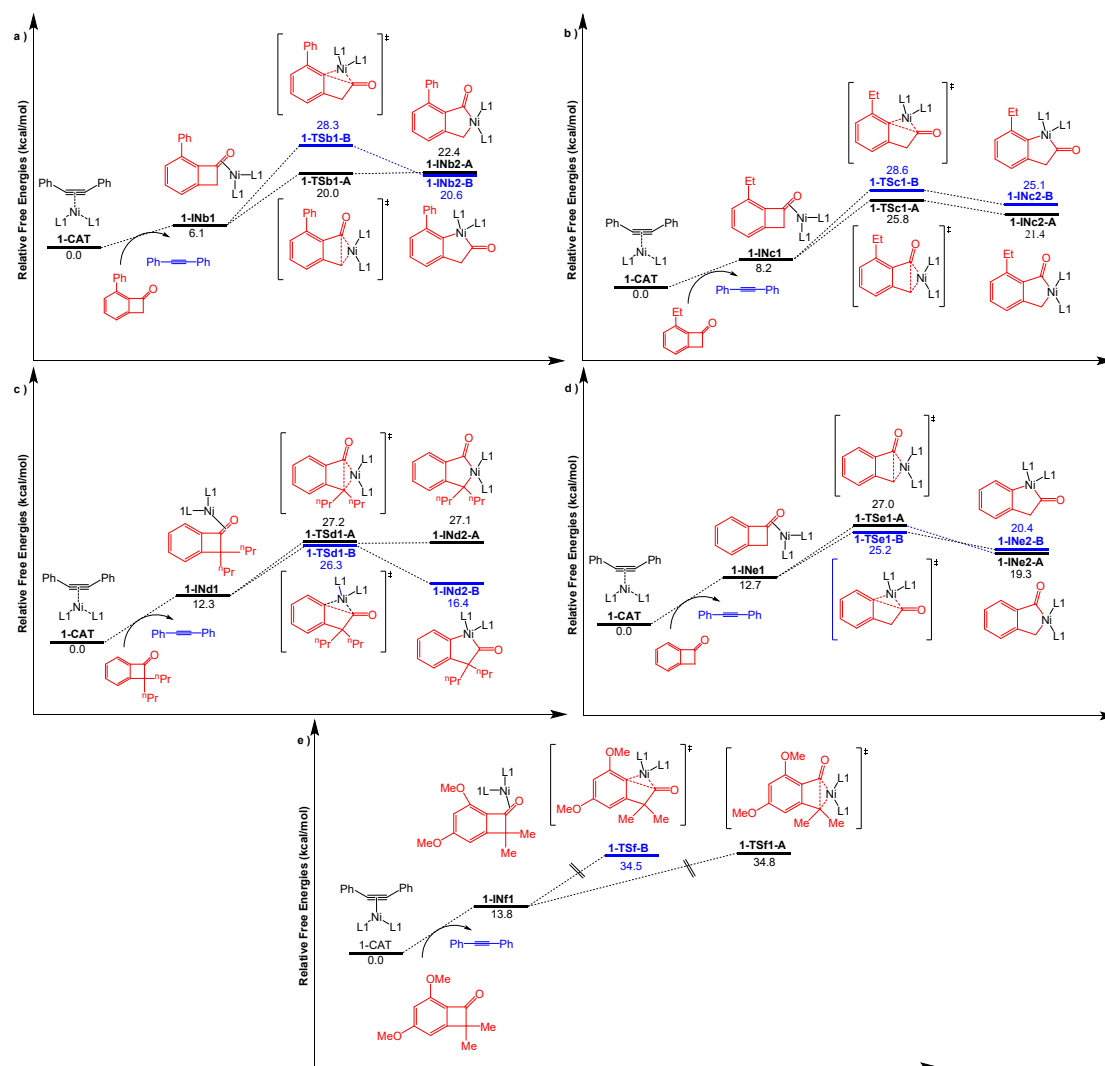

**Fig. S4** Calculated energy profiles for regio-selectivity-determining steps with five substrates. Values shown are relative free energies in kcal/mol.

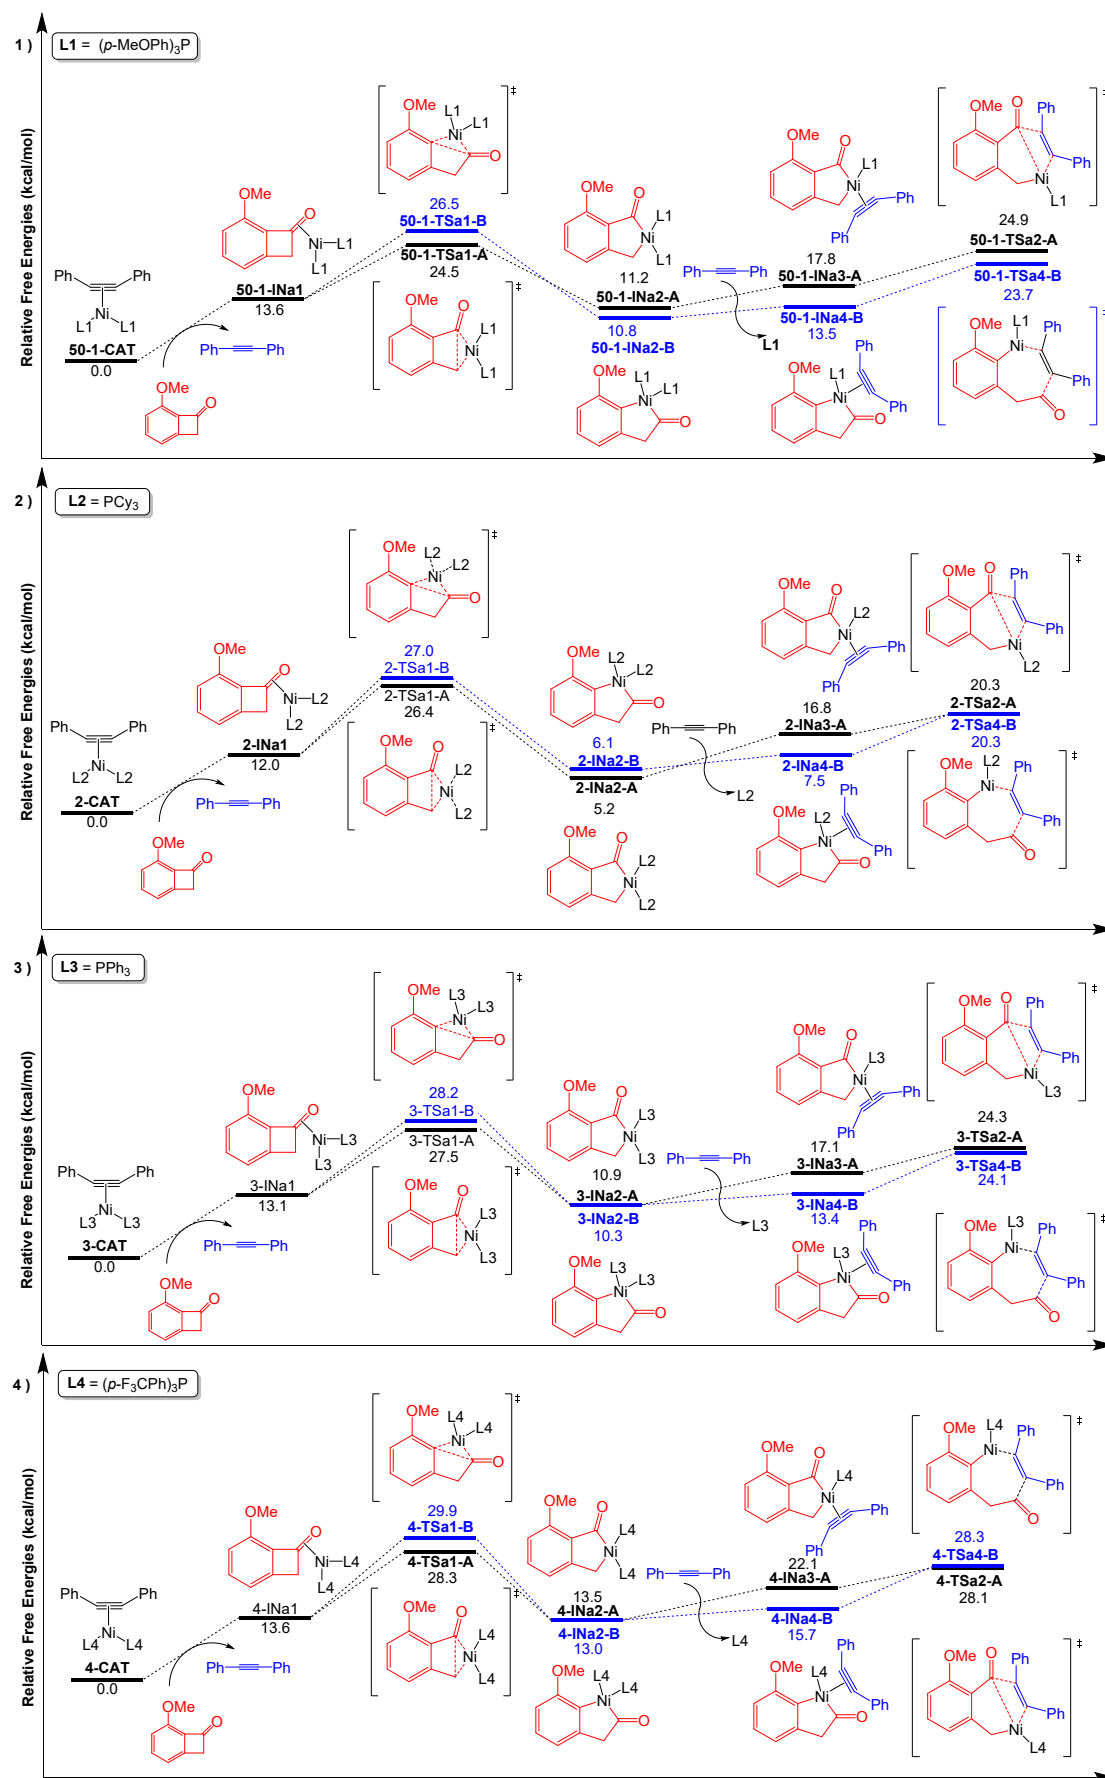

**Fig. S5** Calculated energy profiles for first two steps with four ligands at 50 °C. Values

shown are relative free energies in kcal/mol.

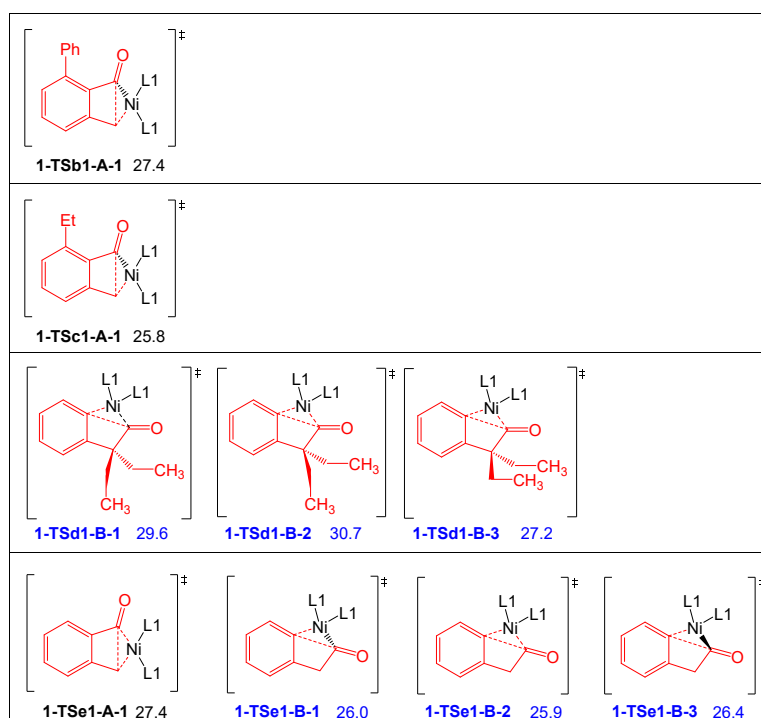

**Fig. S6** Other possible isomers and conformers of oxidative addition transition state for substrates **1b-1d**. Values shown are relative free energies in kcal/mol.

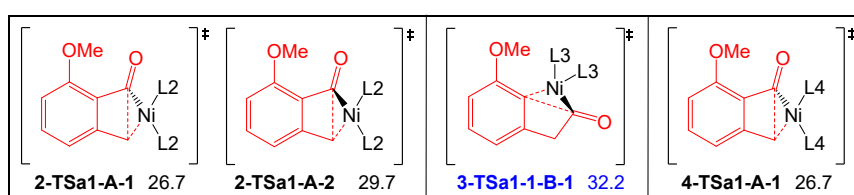

**Fig. S7** Other possible isomers and conformers of oxidative addition transition state for ligands **L2-L4**. Values shown are relative free energies in kcal/mol.

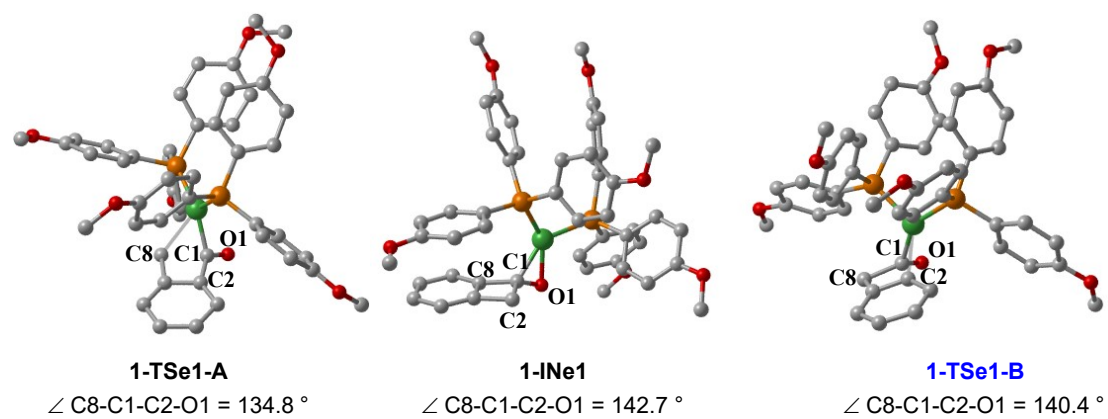

**Fig. S8** Optimized structures and dihedral angle for **1-TSe1-A**, **1-INe1** and **1-TSe1-B** are shown.

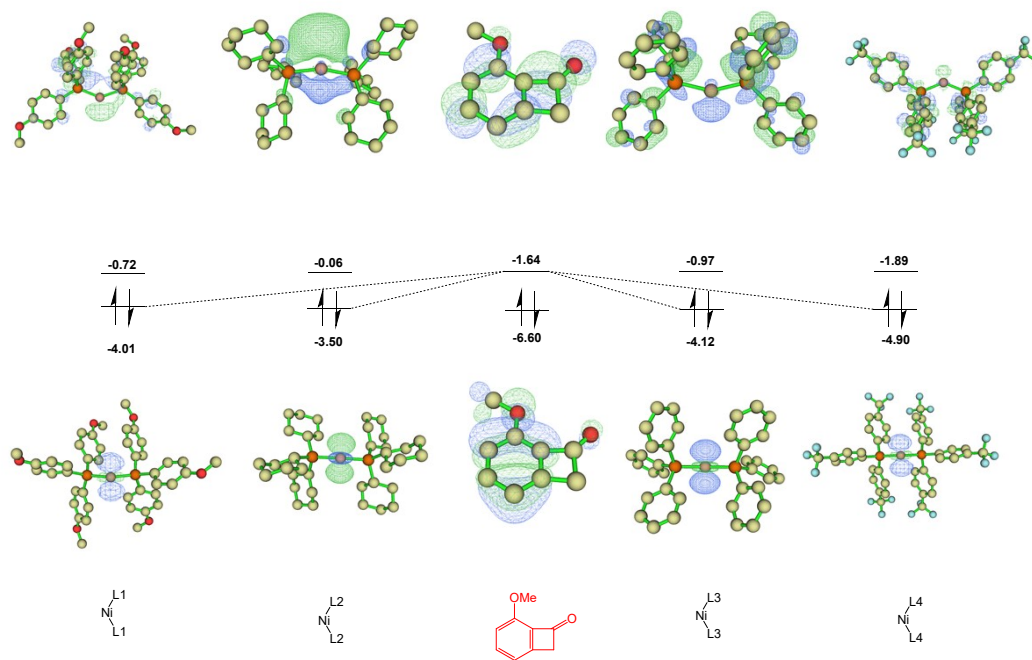

**Fig. S9** Calculated frontier molecular orbitals for **1a** and  $\text{Ni}(\text{Lx})_2$  ( $x=1, 2, 3$  and  $4$ ).

Orbital energies are given in eV.



## Section 5. Other possible pathways for the Ni-catalyzed coupling of benzocyclobutenones with indoles

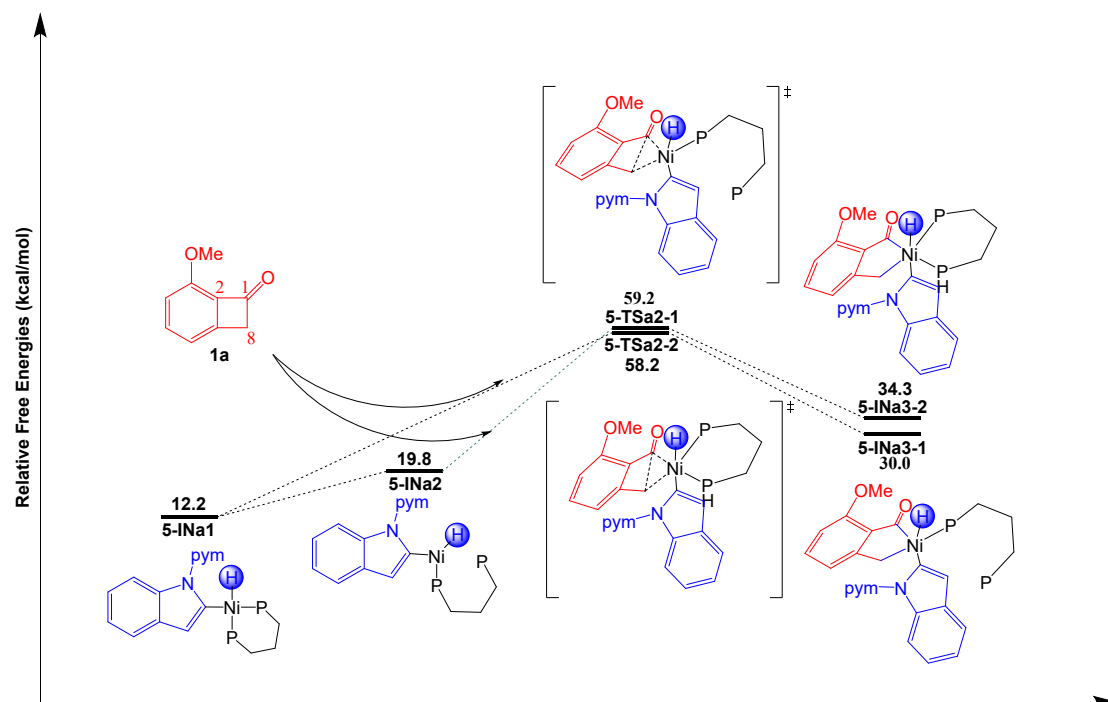

**Fig. S10** Calculated free-energy profiles for oxidative addition to the C1–C8 bond of 5-INa1. Values shown are relative free energies in kcal/mol.

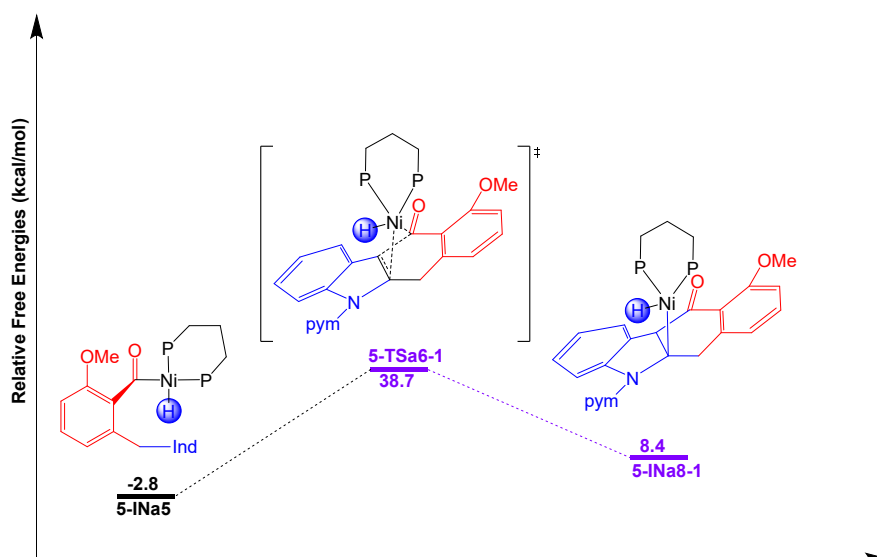

**Fig. S11** Calculated free-energy profiles for bidentate cyclization process from 5-Ina5.

Values shown are relative free energies in kcal/mol.

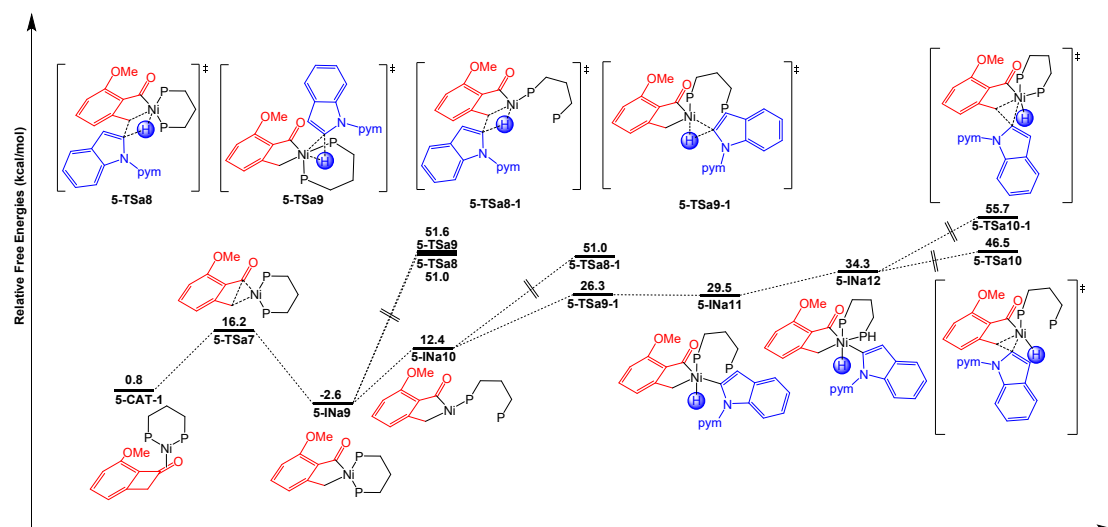

**Fig. S12** Calculated free-energy profiles for the Ni-catalyzed coupling of benzocyclobutenones with indoles (C1–C8 bond cleavage precede C–H bond cleavage). Values shown are relative free energies in kcal/mol.

## Section 6. Energies (in hartree) of All TSs and Intermediates

80 °C, Solvent = Toluene:

| Geometry             | $E_0$        | $E$          | $H_{353.15}$ | $G_{353.15}$ | $E_{(sol,M06)}$ |
|----------------------|--------------|--------------|--------------|--------------|-----------------|
| Ni(cod) <sub>2</sub> | -793.235286  | -793.212270  | -793.211152  | -793.288386  | -793.1396732    |
| NiL <sub>2</sub>     | -2928.955500 | -2928.886708 | -2928.885590 | -2929.075605 | -2928.201928    |
| 1-CAT-1              | -2628.007053 | -2627.938624 | -2627.937506 | -2628.126752 | -2627.1860221   |
| NiL <sub>2</sub> cod | -3240.946744 | -3240.867916 | -3240.866798 | -3241.068770 | -3240.1332592   |
| 1-CAT                | -3468.428804 | -3468.343947 | -3468.342828 | -3468.565323 | -3467.4448296   |
| 1a                   | -498.153625  | -498.141123  | -498.140005  | -498.196650  | -411.7113978    |
| 2                    | -539.400534  | -539.386349  | -539.385231  | -539.446987  | -539.1605215    |
| 1-INa1               | -3427.168190 | -3427.086769 | -3427.085650 | -3427.298871 | -3426.2308471   |
| 1-TSa1-A             | -3427.148229 | -3427.065915 | -3427.064797 | -3427.281382 | -3426.2093251   |
| 1-TSa1-A-PBE0        | -3423.608975 | -3423.526448 | -3423.525330 | -3423.743073 | -3426.2101456   |
| 1-TSa1-A-M06         | -3425.151409 | -3425.069208 | -3425.068090 | -3425.281405 | -3426.2123856   |
| 1-TSa1-A-1           | -3427.138150 | -3427.055799 | -3427.054680 | -3427.269188 | -3426.2012338   |
| 1-TSa1-A-2           | -3427.146930 | -3427.064740 | -3427.063621 | -3427.278118 | -3426.2063363   |
| 1-TSa1-A-3           | -3427.134826 | -3427.052627 | -3427.051508 | -3427.265884 | -3426.2005438   |
| 1-TSa1-A-4           | -3427.148228 | -3427.065914 | -3427.064795 | -3427.281386 | -3426.2093235   |

|                      |              |              |              |              |               |
|----------------------|--------------|--------------|--------------|--------------|---------------|
| <b>1-TSa1-1-A</b>    | -2586.730084 | -2586.664635 | -2586.663516 | -2586.843450 | -2585.9581964 |
| <b>1-TSa1-1-A-1</b>  | -2586.728034 | -2586.662712 | -2586.661594 | -2586.839695 | -2585.956771  |
| <b>1-TSa1-1-A-2</b>  | -2586.726334 | -2586.660297 | -2586.659178 | -2586.842114 | -2585.9527539 |
| <b>1-TSa1-2-A</b>    | -1746.311064 | -1746.263342 | -1746.262224 | -1746.402606 | -1745.7012359 |
| <b>1-TSa1-2-A-1</b>  | -1746.311060 | -1746.263342 | -1746.262223 | -1746.402578 | -1745.7012396 |
| <b>1-TSa1-B</b>      | -3427.146356 | -3427.064355 | -3427.063236 | -3427.276658 | -3426.2091941 |
| <b>1-TSa1-B-PBE0</b> | -3423.603615 | -3423.521293 | -3423.520175 | -3423.736568 | -3426.2091239 |
| <b>1-TSa1-B-M06</b>  | -3425.149750 | -3425.068027 | -3425.066909 | -3425.277237 | -3426.2130765 |
| <b>1-TSa1-1-B</b>    | -2586.728230 | -2586.662751 | -2586.661632 | -2586.840967 | -2585.9579287 |
| <b>1-TSa1-1-B-1</b>  | -2586.732910 | -2586.667888 | -2586.666770 | -2586.844080 | -2585.9594665 |
| <b>1-TSa1-1-B-2</b>  | -2586.735964 | -2586.670984 | -2586.669865 | -2586.846638 | -2585.9635129 |
| <b>1-TSa1-2-B</b>    | -1746.312197 | -1746.263222 | -1746.262104 | -1746.406975 | -1745.700194  |
| <b>1-TSa1-2-B-1</b>  | -1746.312196 | -1746.263222 | -1746.262104 | -1746.406973 | -1745.7002002 |
| <b>1-INa2-A</b>      | -3427.177226 | -3427.095535 | -3427.094417 | -3427.306314 | -3426.2354911 |
| <b>1-INa2-B</b>      | -3427.183554 | -3427.183554 | -3427.183554 | -3427.183554 | -3426.2392424 |
| <b>1-TSa2-B</b>      | -3427.142259 | -3427.059840 | -3427.058721 | -3427.274533 | -3426.2038411 |
| <b>1-TSa2-1-B</b>    | -2586.718142 | -2586.652025 | -2586.650906 | -2586.831894 | -2585.9420827 |
| <b>1-INa3-B</b>      | -3427.156973 | -3427.073192 | -3427.072074 | -3427.292070 | -3426.2155531 |
| <b>1-TSa3-B</b>      | -3427.135072 | -3427.052706 | -3427.051588 | -3427.265070 | -3426.1991036 |
| <b>1-TSa3-1-B</b>    | -2586.702116 | -2586.635795 | -2586.634677 | -2586.814811 | -2585.9269166 |
| <b>1-INa3-A</b>      | -2586.750247 | -2586.683283 | -2586.682165 | -2586.870146 | -2585.9655114 |
| <b>1-INa4-A</b>      | -2586.758372 | -2586.692563 | -2586.691445 | -2586.873179 | -2585.9790055 |
| <b>1-TSa2-C</b>      | -2586.733483 | -2586.668671 | -2586.667552 | -2586.846329 | -2585.958919  |
| <b>1-TSa2-C-PBE0</b> | -2583.949156 | -2583.885385 | -2583.884267 | -2584.061126 | -2585.9586883 |
| <b>1-TSa2-C-M06</b>  | -2585.109922 | -2585.045686 | -2585.044568 | -2585.219456 | -2585.9616118 |
| <b>1-TSa2-C-1</b>    | -2586.731821 | -2586.667067 | -2586.665949 | -2586.845319 | -2585.9568951 |
| <b>1-TSa2-A</b>      | -2586.702116 | -2586.635795 | -2586.634677 | -2586.814811 | -2585.926917  |
| <b>1-TSa2-A-PBE0</b> | -2583.954412 | -2583.889428 | -2583.888310 | -2584.069202 | -2585.9669028 |
| <b>1-TSa2-A-M06</b>  | -2585.120069 | -2585.055095 | -2585.053976 | -2585.232496 | -2585.9708171 |
| <b>1-INa5-A</b>      | -2586.752840 | -2586.687751 | -2586.686633 | -2586.866616 | -2585.9782646 |
| <b>1-INa5-C</b>      | -2586.782784 | -2586.718055 | -2586.716937 | -2586.896238 | -2586.0012458 |
| <b>1-INa6-A</b>      | -3966.635904 | -3966.538579 | -3966.537460 | -3966.779504 | -3965.4729169 |
| <b>1-TSa4-A</b>      | -3966.614910 | -3966.517867 | -3966.516749 | -3966.760484 | -3965.4564973 |
| <b>1-CAT</b>         | -2628.007053 | -2627.938624 | -2627.937506 | -2628.126752 | -2627.1860221 |
| <b>3a-pre</b>        | -1037.647078 | -1037.619126 | -1037.618007 | -1037.711444 | -1037.2279744 |
| <b>1-INa4-B</b>      | -2586.764305 | -2586.698614 | -2586.697496 | -2586.877107 | -2585.9874454 |
| <b>1-INa5-B</b>      | -2586.784071 | -2586.719244 | -2586.718126 | -2586.897559 | -2586.0045506 |
| <b>1-INa6-B</b>      | -3966.649490 | -3966.551865 | -3966.550747 | -3966.795100 | -3965.4845376 |
| <b>1-TSa4-B</b>      | -2586.746523 | -2586.681898 | -2586.680780 | -2586.858249 | -2585.9718229 |
| <b>1-TSa4-B-1</b>    | -2586.744739 | -2586.680401 | -2586.679282 | -2586.857070 | -2585.9693373 |
| <b>1-TSa4-D</b>      | -2586.715340 | -2586.650213 | -2586.649094 | -2586.829155 | -2585.9417673 |
| <b>1-TSa5-B</b>      | -3966.640892 | -3966.543885 | -3966.542767 | -3966.785451 | -3965.47894   |
| <b>4-pre</b>         | -1037.647711 | -1037.619715 | -1037.618596 | -1037.711333 | -1037.2290201 |

|                   |              |              |              |              |               |
|-------------------|--------------|--------------|--------------|--------------|---------------|
| <b>1-CAT-1</b>    | -2628.007053 | -2627.938624 | -2627.937506 | -2628.126752 | -2627.1860221 |
| <b>Nicod2</b>     | -793.235286  | -793.212270  | -793.211152  | -793.288386  | -793.1396732  |
| <b>NicodL2</b>    | -3240.946744 | -3240.867916 | -3240.866798 | -3241.068770 | -3240.1332592 |
| <b>NiL2</b>       | -2928.955500 | -2928.886708 | -2928.885590 | -2929.075605 | -2928.201928  |
| <b>1b</b>         | -614.664372  | -614.648791  | -614.647673  | -614.712058  | -614.4042955  |
| <b>1-INb1</b>     | -3543.692235 | -3543.607109 | -3543.605991 | -3543.825373 | -3542.6831746 |
| <b>1-INb2-A</b>   | -3543.655753 | -3543.571970 | -3543.570852 | -3543.785684 | -3542.6746307 |
| <b>1-INb2-B</b>   | -3543.686490 | -3543.613171 | -3543.612147 | -3543.805721 | -3542.6722222 |
| <b>1-TSb1-A</b>   | -3543.664217 | -3543.578870 | -3543.577752 | -3543.800173 | -3542.6558668 |
| <b>1-TSb1-A-1</b> | -3543.661177 | -3543.576997 | -3543.575879 | -3543.792276 | -3542.6488828 |
| <b>1-TSb1-B</b>   | -3543.655753 | -3543.571970 | -3543.570852 | -3543.785684 | -3542.6495454 |
| <b>1c</b>         | -462.228338  | -462.215338  | -462.214220  | -462.272027  | -462.0603169  |
| <b>1-INc1</b>     | -3391.247673 | -3391.164869 | -3391.163751 | -3391.380712 | -3390.3312749 |
| <b>1-INc2-A</b>   | -3391.252662 | -3391.183017 | -3391.181993 | -3391.363908 | -3390.3312999 |
| <b>1-INc2-B</b>   | -3391.248472 | -3391.178023 | -3391.177000 | -3391.361377 | -3390.3253233 |
| <b>1-TSc1-A</b>   | -3391.221070 | -3391.138167 | -3391.137048 | -3391.354225 | -3390.3010975 |
| <b>1-TSc1-A-1</b> | -3391.221066 | -3391.138165 | -3391.137046 | -3391.354210 | -3390.3011016 |
| <b>1-TSc1-B</b>   | -3391.216259 | -3391.133875 | -3391.132757 | -3391.347079 | -3390.3004126 |
| <b>1d</b>         | -619.409865  | -619.389361  | -619.388243  | -619.463611  | -619.2255213  |
| <b>1-INd1</b>     | -3548.423014 | -3548.332595 | -3548.331477 | -3548.566617 | -3547.489804  |
| <b>1-INd2-A</b>   | -3548.424999 | -3548.348095 | -3548.347072 | -3548.545955 | -3547.4885935 |
| <b>1-INd2-B</b>   | -3548.441548 | -3548.364422 | -3548.363399 | -3548.564057 | -3547.5042672 |
| <b>1-TSd1-A</b>   | -3548.402040 | -3548.311894 | -3548.310775 | -3548.542401 | -3547.4680974 |
| <b>1-TSd1-B</b>   | -3548.402450 | -3548.312773 | -3548.311654 | -3548.540415 | -3547.4724728 |
| <b>1-TSd1-B-1</b> | -3548.398314 | -3548.308586 | -3548.307468 | -3548.538225 | -3547.4654653 |
| <b>1-TSd1-B-2</b> | -3548.397516 | -3548.307835 | -3548.306716 | -3548.536765 | -3547.4643431 |
| <b>1-TSd1-B-3</b> | -3548.400580 | -3548.310759 | -3548.309640 | -3548.539598 | -3547.468975  |
| <b>1e</b>         | -383.628680  | -383.619566  | -383.618447  | -383.667094  | -383.4714218  |
| <b>1-INe1</b>     | -3312.643093 | -3312.564162 | -3312.563044 | -3312.771541 | -3311.7346208 |
| <b>1-INe2-A</b>   | -3312.655091 | -3312.587757 | -3312.586734 | -3312.765797 | -3311.741069  |
| <b>1-INe2-B</b>   | -3312.652613 | -3312.585031 | -3312.584008 | -3312.764511 | -3311.7387932 |
| <b>1-TSe1-A</b>   | -3312.622102 | -3312.543129 | -3312.542010 | -3312.750532 | -3311.7098269 |
| <b>1-TSe1-A-1</b> | -3312.609086 | -3312.530411 | -3312.529292 | -3312.736160 | -3311.7021118 |
| <b>1-TSe1-B</b>   | -3312.623176 | -3312.545359 | -3312.544241 | -3312.747150 | -3311.7196001 |
| <b>1-TSe1-B-1</b> | -3312.622655 | -3312.544226 | -3312.543108 | -3312.749091 | -3311.7148701 |
| <b>1-TSe1-B-2</b> | -3312.622665 | -3312.544230 | -3312.543112 | -3312.749158 | -3311.7148816 |
| <b>1-TSe1-B-3</b> | -3312.620967 | -3312.542426 | -3312.541308 | -3312.748357 | -3311.7131568 |
| <b>1f</b>         | -691.281283  | -691.261115  | -691.259997  | -691.333646  | -691.0553755  |
| <b>1-INf1</b>     | -3620.301329 | -3620.212669 | -3620.211550 | -3620.437141 | -3619.3239682 |
| <b>1-TSf1-A</b>   | -3620.265005 | -3620.176432 | -3620.175314 | -3620.401287 | -3619.2881991 |
| <b>1-TSf1-B</b>   | -3620.268910 | -3620.179371 | -3620.178253 | -3620.407129 | -3619.295825  |

**50 °C, Solvent = Toluene:**

|                    |              |              |              |              |               |
|--------------------|--------------|--------------|--------------|--------------|---------------|
| <b>1a-50</b>       | -498.153625  | -498.143011  | -498.141988  | -498.191926  | -497.9671672  |
| <b>2-50</b>        | -539.400532  | -539.388616  | -539.387592  | -539.441848  | -539.1605254  |
| <b>50-L1</b>       | -1379.799622 | -1379.772275 | -1379.771252 | -1379.862957 | -1379.3963482 |
| <b>50-1-CAT</b>    | -3468.428804 | -3468.356675 | -3468.355652 | -3468.546990 | -3467.4448296 |
| <b>50-1-INa1</b>   | -3427.168119 | -3427.098932 | -3427.097908 | -3427.280973 | -3426.2308607 |
| <b>50-1-TSa1-A</b> | -3427.148229 | -3427.078178 | -3427.077155 | -3427.263556 | -3426.2093255 |
| <b>50-1-TSa1-B</b> | -3427.146752 | -3427.077254 | -3427.076230 | -3427.258946 | -3426.2107621 |
| <b>50-1-INa2-A</b> | -3427.177140 | -3427.107753 | -3427.106730 | -3427.288282 | -3426.2355996 |
| <b>50-1-INa2-B</b> | -3427.183553 | -3427.113862 | -3427.112839 | -3427.294073 | -3426.2392461 |
| <b>50-1-INa3-A</b> | -2586.758372 | -2586.702415 | -2586.701392 | -2586.858181 | -2585.9790055 |
| <b>50-1-INa4-B</b> | -2586.764305 | -2586.708465 | -2586.707442 | -2586.862290 | -2585.9874453 |
| <b>50-1-TSa2-A</b> | -2586.740194 | -2586.685055 | -2586.684031 | -2586.837303 | -2585.9683356 |
| <b>50-1-TSa4-B</b> | -2586.746523 | -2586.691631 | -2586.690608 | -2586.843608 | -2585.9718229 |
| <b>L2</b>          | -1046.915853 | -1046.893430 | -1046.892407 | -1046.968439 | -1046.790922  |
| <b>2-CAT</b>       | -2802.645427 | -2802.583204 | -2802.582181 | -2802.745134 | -2802.2261803 |
| <b>2-INa1</b>      | -2761.393298 | -2761.333737 | -2761.332714 | -2761.487830 | -2253.3727118 |
| <b>2-TSa1-A</b>    | -2761.365768 | -2761.305494 | -2761.304470 | -2761.461149 | -2760.9886761 |
| <b>2-TSa1-A-1</b>  | -2761.365297 | -2761.305144 | -2761.304120 | -2761.460322 | -2760.9888521 |
| <b>2-TSa1-A-2</b>  | -2761.362002 | -2761.301795 | -2761.300772 | -2761.456582 | -2760.9846197 |
| <b>2-TSa1-B</b>    | -2761.365105 | -2761.305060 | -2761.304037 | -2761.459447 | -2760.9896193 |
| <b>2-INa2-A</b>    | -2761.400054 | -2761.339199 | -2761.338175 | -2761.498012 | -2761.0209971 |
| <b>2-INa2-B</b>    | -2761.403266 | -2761.342361 | -2761.341337 | -2761.500304 | -2761.0208419 |
| <b>2-INa3-A</b>    | -2253.871185 | -2253.819005 | -2253.817982 | -2253.964965 | -2253.3623707 |
| <b>2-INa4-B</b>    | -2253.879259 | -2253.828133 | -2253.827110 | -2253.968414 | -2253.3836665 |
| <b>2-TSa2-A</b>    | -2253.856782 | -2253.806533 | -2253.805510 | -2253.944037 | -2253.3635165 |
| <b>2-TSa4-B</b>    | -2253.861387 | -2253.812500 | -2253.811477 | -2253.945804 | -2253.3682417 |
| <b>L3</b>          | -1036.226391 | -1036.207840 | -1036.206816 | -1036.278247 | -1035.9109975 |
| <b>3-CAT</b>       | -2781.279073 | -2781.224730 | -2781.223707 | -2781.375125 | -2780.4696365 |
| <b>3-INa1</b>      | -2740.018953 | -2739.966539 | -2739.965516 | -2740.111420 | -2739.2547937 |
| <b>3-TSa1-A</b>    | -2739.991540 | -2739.938654 | -2739.937631 | -2740.085461 | -2739.2270994 |
| <b>3-TSa1-B</b>    | -2739.991632 | -2739.939274 | -2739.938250 | -2740.083945 | -2739.229291  |
| <b>3-TSa1-B-1</b>  | -2739.991647 | -2739.939280 | -2739.938257 | -2740.084027 | -2739.2260383 |
| <b>3-INa2-A</b>    | -2740.021450 | -2739.968525 | -2739.967502 | -2740.115366 | -2739.2553539 |
| <b>3-INa2-B</b>    | -2740.025484 | -2739.972282 | -2739.971259 | -2740.119305 | -2739.2567581 |
| <b>3-INa3-A</b>    | -2243.183091 | -2243.136015 | -2243.134992 | -2243.270985 | -2242.4913279 |
| <b>3-INa4-B</b>    | -2243.188042 | -2243.141049 | -2243.140026 | -2243.274330 | -2242.4984564 |
| <b>3-TSa2-A</b>    | -2243.163137 | -2243.116713 | -2243.115689 | -2243.249920 | -2242.4787012 |
| <b>3-TSa4-B</b>    | -2243.170448 | -2243.124511 | -2243.123488 | -2243.255206 | -2242.4829435 |
| <b>L4</b>          | -2047.649061 | -2047.618897 | -2047.617874 | -2047.720782 | -2047.0182001 |
| <b>4-CAT</b>       | -4804.133007 | -4804.053525 | -4804.052502 | -4804.268526 | -4802.6922094 |
| <b>4-INa1</b>      | -4762.871606 | -4762.794137 | -4762.793113 | -4763.004469 | -4761.4762784 |

|                   |              |              |              |              |               |
|-------------------|--------------|--------------|--------------|--------------|---------------|
| <b>4-TSa1-A</b>   | -4762.848329 | -4762.770542 | -4762.769518 | -4762.980667 | -4761.4503823 |
| <b>4-TSa1-A-1</b> | -4762.844097 | -4762.766530 | -4762.765506 | -4762.974381 | -4761.4468299 |
| <b>4-TSa1-B</b>   | -4762.845279 | -4762.768717 | -4762.767693 | -4762.975689 | -4761.4506888 |
| <b>4-INa2-A</b>   | -4762.877084 | -4762.799444 | -4762.798420 | -4763.006719 | -4761.4784738 |
| <b>4-INa2-B</b>   | -4762.876556 | -4762.798196 | -4762.797173 | -4763.010647 | -4761.4744766 |
| <b>4-INa3-A</b>   | -3254.607878 | -3254.548213 | -3254.547189 | -3254.715379 | -3253.5985999 |
| <b>4-INa4-B</b>   | -3254.614626 | -3254.555032 | -3254.554008 | -3254.722734 | -3253.608086  |
| <b>4-TSa2-A</b>   | -3254.586896 | -3254.527906 | -3254.526882 | -3254.694975 | -3253.5863683 |
| <b>4-TSa4-B</b>   | -3254.595083 | -3254.536570 | -3254.535547 | -3254.700468 | -3253.5906378 |

**140 °C, Solvent = 1,4-dioxane:**

|                    |              |              |              |              |               |
|--------------------|--------------|--------------|--------------|--------------|---------------|
| <b>1a-1</b>        | -498.153310  | -498.136583  | -498.135275  | -498.206296  | -497.9668201  |
| <b>ind</b>         | -626.923975  | -626.904009  | -626.902701  | -626.981277  | -626.6511293  |
| <b>5-CAT</b>       | -2523.416720 | -2523.343157 | -2523.341848 | -2523.543933 | -2522.7507199 |
| <b>5-INa1</b>      | -2523.401952 | -2523.327938 | -2523.326629 | -2523.528435 | -2522.727581  |
| <b>5-TSa1</b>      | -2523.399956 | -2523.326746 | -2523.325438 | -2523.523943 | -2522.730609  |
| <b>5-INa2</b>      | -2523.392981 | -2523.319022 | -2523.317714 | -2523.523183 | -2522.7134164 |
| <b>5-TSa2</b>      | -3021.557865 | -3021.465345 | -3021.464036 | -3021.712533 | -3020.6988549 |
| <b>5-TSa2-1</b>    | -3021.506482 | -3021.413264 | -3021.411956 | -3021.659681 | -3020.6460517 |
| <b>5-TSa2-2</b>    | -3021.507337 | -3021.414312 | -3021.413004 | -3021.658113 | -3020.6504217 |
| <b>5-TSa3</b>      | -3021.506078 | -3021.412907 | -3021.411599 | -3021.661687 | -3020.6409092 |
| <b>5-TSa3-1</b>    | -3021.462350 | -3021.370012 | -3021.368703 | -3021.608813 | -3020.6097705 |
| <b>5-INa3</b>      | -3021.575729 | -3021.482869 | -3021.481560 | -3021.725093 | -3020.7190002 |
| <b>5-INa3-1</b>    | -3021.559844 | -3021.467247 | -3021.465938 | -3021.709116 | -3020.6998347 |
| <b>5-INa3-2</b>    | -3021.551189 | -3021.459218 | -3021.457909 | -3021.693908 | -3020.699753  |
| <b>5-INa4</b>      | -3021.614262 | -3021.520834 | -3021.519526 | -3021.767512 | -3020.7512236 |
| <b>5-INa4-1</b>    | -3021.573204 | -3021.479770 | -3021.478461 | -3021.724939 | -3020.709399  |
| <b>5-INa5</b>      | -3021.611700 | -3021.519596 | -3021.518287 | -3021.754791 | -3020.760223  |
| <b>5-TSa4</b>      | -3021.583488 | -3021.491801 | -3021.490492 | -3021.727172 | -3020.7328028 |
| <b>5-TSa4-PBE0</b> | -3018.497033 | -3018.405724 | -3018.404416 | -3018.635492 | -3020.7328028 |
| <b>5-TSa4-M06</b>  | -3019.794579 | -3019.702888 | -3019.701579 | -3019.935446 | -3020.7352198 |
| <b>5-INa6</b>      | -3021.601659 | -3021.508642 | -3021.507334 | -3021.747811 | -3020.7525879 |
| <b>5-INa7</b>      | -2908.242119 | -2908.153540 | -2908.152232 | -2908.381822 | -2907.4373629 |
| <b>5-TSa5</b>      | -2908.234639 | -2908.145894 | -2908.144585 | -2908.375981 | -2907.4286917 |
| <b>5-TSa6</b>      | -3021.540997 | -3021.449390 | -3021.448082 | -3021.687765 | -3020.6947882 |
| <b>5-TSa6-PBE0</b> | -3018.468946 | -3018.377465 | -3018.376157 | -3018.617796 | -3020.6930125 |
| <b>5-TSa6-M06</b>  | -3019.761695 | -3019.671295 | -3019.669987 | -3019.903474 | -3020.6989976 |
| <b>5-TSa6-1</b>    | -3021.541457 | -3021.451544 | -3021.450236 | -3021.679703 | -3020.6964792 |
| <b>5-INa8</b>      | -3021.575696 | -3021.483730 | -3021.482422 | -3021.723153 | -3020.7215922 |
| <b>5-INa8-1</b>    | -3021.586774 | -3021.495615 | -3021.494306 | -3021.731025 | -3020.7419146 |
| <b>6a</b>          | -1011.770725 | -1011.734954 | -1011.733646 | -1011.850360 | -1011.3625462 |

|                  |              |              |              |              |               |
|------------------|--------------|--------------|--------------|--------------|---------------|
| <b>5-CAT-1</b>   | -2394.653836 | -2394.583785 | -2394.582477 | -2394.776058 | -2394.0664386 |
| <b>5-TSa7</b>    | -2394.627688 | -2394.557563 | -2394.556254 | -2394.749644 | -2394.0393605 |
| <b>5-INa9</b>    | -2394.661722 | -2394.591225 | -2394.589917 | -2394.783769 | -2394.0711223 |
| <b>5-TSa8</b>    | -3021.526793 | -3021.436244 | -3021.434935 | -3021.665557 | -3020.6748974 |
| <b>5-TSa9</b>    | -3021.526905 | -3021.435820 | -3021.434511 | -3021.670331 | -3020.6690804 |
| <b>5-INa10</b>   | -2394.634563 | -2394.563204 | -2394.561896 | -2394.766754 | -2394.0361613 |
| <b>5-TSa8-1</b>  | -3021.507340 | -3021.415812 | -3021.414504 | -3021.658469 | -3020.6480674 |
| <b>5-TSa9-1</b>  | -3021.563429 | -3021.471240 | -3021.469931 | -3021.709625 | -3020.7067859 |
| <b>5-INa11</b>   | -3021.561136 | -3021.468774 | -3021.467466 | -3021.706558 | -3020.704447  |
| <b>5-INa12</b>   | -3021.551189 | -3021.459218 | -3021.457909 | -3021.693908 | -3020.699753  |
| <b>5-TSa10</b>   | -3021.514395 | -3021.421505 | -3021.420197 | -3021.666705 | -3020.652239  |
| <b>5-TSa10-1</b> | -3021.534461 | -3021.443113 | -3021.441805 | -3021.675652 | -3020.680807  |

$E_0$  = Sum of electronic and zero-point energies calculated by B3LYP-D3 in solvent

$E$  = Sum of electronic and thermal energies calculated by B3LYP-D3 in solvent

$H_{T^\circ C}$  = Sum of electronic and thermal enthalpies calculated by B3LYP-D3 in solvent

$G_{T^\circ C}$  = Sum of electronic and thermal free energies calculated by B3LYP-D3 in solvent

$E_{(M06)}$  = Single point energies calculated by M06-D3 in solvent

## Section 7. Calculated imaginary frequencies of all transition states

species

| Species              | Frequency |
|----------------------|-----------|
| <b>1-TSa1-A</b>      | -210.92   |
| <b>1-TSa1-A-1</b>    | -300.13   |
| <b>1-TSa1-A-2</b>    | -274.10   |
| <b>1-TSa1-A-3</b>    | -305.93   |
| <b>1-TSa1-A-4</b>    | -210.89   |
| <b>1-TSa1-A-PBE0</b> | -241.61   |
| <b>1-TSa1-A-M06</b>  | -191.69   |
| <b>1-TSa1-1-A</b>    | -269.62   |

|                      |         |
|----------------------|---------|
| <b>1-TSa1-1-A-1</b>  | -261.92 |
| <b>1-TSa1-1-A-2</b>  | -257.92 |
| <b>1-TSa1-2-A</b>    | -298.35 |
| <b>1-TSa1-2-A-1</b>  | -298.29 |
| <b>1-TSa1-B</b>      | -226.23 |
| <b>1-TSa1-B-PBE0</b> | -193.31 |
| <b>1-TSa1-B-M06</b>  | -171.78 |
| <b>1-TSa1-1-B</b>    | -195.12 |
| <b>1-TSa1-1-B-1</b>  | -181.85 |
| <b>1-TSa1-1-B-2</b>  | -81.18  |
| <b>1-TSa1-2-B</b>    | -167.31 |
| <b>1-TSa1-2-B-1</b>  | -167.13 |
| <b>1-TSa2-A</b>      | -311.52 |
| <b>1-TSa2-A-1</b>    | -307.73 |
| <b>1-TSa2-A-PBE0</b> | -270.34 |
| <b>1-TSa2-A-M06</b>  | -240.93 |
| <b>1-TSa2-C</b>      | -282.34 |
| <b>1-TSa2-C-1</b>    | -287.47 |
| <b>1-TSa2-C-PBE0</b> | -269.89 |
| <b>1-TSa2-C-M06</b>  | -231.54 |
| <b>1-TSa2-B</b>      | -146.61 |
| <b>1-TSa2-1-B</b>    | -210.72 |
| <b>1-TSa3-B</b>      | -324.21 |
| <b>1-TSa3-1-B</b>    | -317.14 |
| <b>1-TSa4-A</b>      | -343.12 |
| <b>1-TSb1-A</b>      | -245.66 |
| <b>1-TSb1-A-1</b>    | -278.23 |
| <b>1-TSb1-B</b>      | -225.36 |
| <b>1-TSc1-A</b>      | -250.26 |
| <b>1-TSc1-A-1</b>    | -249.99 |
| <b>1-TSc1-B</b>      | -216.07 |
| <b>1-TSd1-A</b>      | -229.74 |
| <b>1-TSd1-B</b>      | -135.20 |
| <b>1-TSd1-B-1</b>    | -230.56 |
| <b>1-TSd1-B-2</b>    | -231.78 |
| <b>1-TSd1-B-3</b>    | -128.98 |
| <b>1-TSe1-A</b>      | -284.06 |
| <b>1-TSe1-A-1</b>    | -331.47 |
| <b>1-TSe1-B</b>      | -188.36 |
| <b>1-TSe1-B-1</b>    | -206.76 |
| <b>1-TSe1-B-2</b>    | -206.73 |
| <b>1-TSe1-B-3</b>    | -249.63 |
| <b>1-TSf1-A</b>      | -226.73 |



|                    |         |
|--------------------|---------|
| <b>1-TSf1-B</b>    | -186.15 |
| <b>50-1-TSa1-A</b> | -211.16 |
| <b>50-1-TSa1-B</b> | -186.40 |
| <b>50-1-TSa2-A</b> | -311.52 |
| <b>50-1-TSa4-B</b> | -356.10 |
| <b>2-TSa1-A</b>    | -225.05 |
| <b>2-TSa1-A-1</b>  | -295.69 |
| <b>2-TSa1-A-2</b>  | -257.60 |
| <b>2-TSa1-B</b>    | -249.85 |
| <b>2-TSa2-A</b>    | -330.90 |
| <b>2-TSa4-B</b>    | -280.16 |
| <b>3-TSa1-A</b>    | -299.09 |
| <b>3-TSa1-B</b>    | -222.03 |
| <b>3-TSa1-B-1</b>  | -221.91 |
| <b>3-TSa2-A</b>    | -315.21 |
| <b>3-TSa4-B</b>    | -349.54 |
| <b>4-TSa1-A</b>    | -279.33 |
| <b>4-TSa1-A-1</b>  | -295.21 |
| <b>4-TSa1-B</b>    | -214.70 |
| <b>4-TSa2-A</b>    | -314.35 |
| <b>4-TSa4-B</b>    | -348.66 |
| <b>5-TSa1</b>      | -687.88 |
| <b>5-TSa2</b>      | -552.37 |
| <b>5-TSa2-1</b>    | -265.26 |
| <b>5-TSa2-2</b>    | -349.48 |
| <b>5-TSa3</b>      | -437.67 |
| <b>5-TSa3-1</b>    | -120.47 |
| <b>5-TSa4</b>      | -192.28 |
| <b>5-TSa4-PBE0</b> | -175.16 |
| <b>5-TSa4-M06</b>  | -123.42 |
| <b>5-TSa5</b>      | -679.22 |
| <b>5-TSa6</b>      | -258.70 |
| <b>5-TSa6-PBE0</b> | -211.76 |
| <b>5-TSa6-M06</b>  | -155.06 |
| <b>5-TSa6-1</b>    | -311.50 |
| <b>5-TSa7</b>      | -275.12 |
| <b>5-TSa8</b>      | -552.64 |
| <b>5-TSa9</b>      | -729.22 |
| <b>5-TSa8-1</b>    | -385.52 |
| <b>5-TSa9-1</b>    | -687.73 |
| <b>5-TSa10</b>     | -258.26 |
| <b>5-TSa10-1</b>   | -334.92 |
